# Supplementary material
Source: PubMed Central journal article supplement (PMC5153957)
Supplement: JVIM-30-1090-s002.pdf [file JVIM-30-1090-s002.pdf]

**Table A:** Parameters evaluated statistically and their classification. Statistical tests used to compare each parameter between first and second evaluations are also specified.

| Parameter Evaluated                       | Data Classification           | Statistical test used to compare parameters (i.e. first vs. second evaluation) |
|-------------------------------------------|-------------------------------|--------------------------------------------------------------------------------|
| <b>Clinical Status</b>                    |                               |                                                                                |
| Neurologic signs                          | Categorical (Y/N)             | Fisher's Exact                                                                 |
| New development                           |                               |                                                                                |
| Worsening                                 |                               |                                                                                |
| Neurologic grade                          | Ordinal (0-5)                 | Fisher's Exact                                                                 |
| New development                           |                               |                                                                                |
| Worsening                                 |                               |                                                                                |
| Neck pain grade                           | Ordinal (0-3)                 | Fisher's Exact                                                                 |
| New development                           |                               |                                                                                |
| Worsening                                 |                               |                                                                                |
| <b>Syringomyelia</b>                      |                               |                                                                                |
| Presence                                  | Categorical (Y/N)             | Fisher's Exact                                                                 |
| New development                           | Ordinal (0-3)                 | Fisher's Exact                                                                 |
| Worsening grade                           | Categorical (Y/N)             | Fisher's Exact                                                                 |
| Change in maximum height                  | Continuous (mm)               | Signed Rank                                                                    |
| <b>Craniocervical junction morphology</b> |                               |                                                                                |
| Chiari-like malformation                  | Categorical (Y/N)             | Fisher's Exact                                                                 |
| <b>Cerebellum</b>                         |                               |                                                                                |
| Herniation                                | Continuous (mm)               | Signed Rank                                                                    |
| Indentation                               | Categorical (Y/N)             | Fisher's Exact                                                                 |
| Foramen magnum height                     | Continuous (mm)               | Signed Rank                                                                    |
| Atlantooccipital overlapping              | Categorical (Y/N)             | Fisher's Exact                                                                 |
| <b>Dorsal atlantoaxial band</b>           |                               |                                                                                |
| Presence                                  | Categorical (Y/N)             | Fisher's Exact and McNemar's                                                   |
| Grade                                     | Ordinal (0-3)                 | Fisher's Exact                                                                 |
| Compression index                         | Continuous (%)                | Signed Rank                                                                    |
| <b>Medullary position</b>                 |                               |                                                                                |
| Medullary kinking index                   | Continuous (%)                | Signed Rank                                                                    |
| Obex position                             | Continuous (mm)               | Signed Rank                                                                    |
| <b>Cranial cavity volume</b>              |                               |                                                                                |
| Rostral cranial fossa                     | Continuous (mm <sup>3</sup> ) | Signed Rank                                                                    |
| Caudal cranial fossa                      | Continuous (mm <sup>3</sup> ) | Signed Rank                                                                    |
| Ratio caudal:total cranial fossa volume   | Continuous (%)                | Signed Rank                                                                    |
